# Supplementary material
Source: MDPI journal article supplement (https://www.mdpi.com/2073-4395/12/6/1343)
Supplement: s1 [file s1]

## Phosphorus content in potato starch, %

| Variety           | 2017   | 2018   | 2019   |
|-------------------|--------|--------|--------|
| Zhigulevsky       | 0,0778 | 0,0931 | 0,0857 |
| Klada             | 0,0843 | ----   | 0,0793 |
| Zhukovsky rannii  | 0,0710 | 0,0861 | 0,0785 |
| Antonina          | 0,0811 | 0,0935 | 0,0781 |
| Arlekin           | 0,0697 | 0,0794 | 0,0759 |
| Babushka          | 0,0598 | 0,0642 | ----   |
| Sarovsky          | 0,0654 | 0,0712 | 0,0692 |
| Reggy             | 0,0842 | 0,0785 | 0,0875 |
| Red Scarlett      | 0,0634 | 0,0594 | 0,0657 |
| Picasso           | 0,0821 | ----   | 0,0988 |
| Gulliver          | 0,0541 | 0,0500 | 0,0670 |
| Pamyati Rogacheva | 0,0973 | 0,0934 | 0,0991 |
| Sudarynya         | 0,0805 | 0,0939 | 0,0750 |
| DiDzhon12         | 0,0797 | 0,0638 | ----   |
| G 06-08-2015      | 0,0765 | 0,0759 | ----   |
| Tanay             | 0,0605 | 0,0544 | 0,0627 |
| Golubizna         | 0,0871 | 0,0732 | 0,0961 |
| Fritella          | 0,0738 | 0,0828 | ----   |
| Selma             | 0,0522 | 0,0588 | 0,0669 |
| Alena             | 0,0674 | 0,0830 | 0,0707 |
| Zizella           | 0,0674 | 0,0610 | 0,0634 |
| Khozyayushka      | 0,0547 | 0,0578 | 0,0666 |
| Sante             | 0,0535 | 0,0604 | 0,0546 |
| G 3-43-2          | 0,0628 | 0,0668 | ----   |
| Maret             | 0,0690 | 0,0747 | 0,0797 |
| Diamant           | 0,0706 | 0,0788 | 0,0784 |
| Udacha            | 0,0558 | 0,0690 | 0,0588 |
| Yuna              | 0,0484 | 0,0502 | 0,0577 |
| Vasilek           | 0,0924 | 0,1057 | 0,1058 |
| G 21.8516         | 0,0742 | 0,0867 | ----   |
| Gornyak           | 0,0665 | 0,0641 | 0,0790 |
| Kemirovchanin     | 0,0607 | 0,0659 | 0,0737 |
| Lina              | 0,0631 | 0,0630 | 0,0621 |
| Russkii Suvenir   | 0,0801 | 0,0816 | 0,0860 |
| Nakra             | 0,0617 | 0,0739 | 0,0664 |
| Safo              | 0,0663 | 0,0767 | 0,0796 |
| Tango             | 0,0723 | 0,0878 | 0,0875 |

|                  |        |        |        |
|------------------|--------|--------|--------|
| Stigniia         | 0,0916 | 0,1031 | 0,1020 |
| G 25/861         | 0,0789 | ----   | ----   |
| 785/8-5          | 0,0854 | 0,0760 | ----   |
| Ruslan           | 0,0856 | 0,1030 | 0,0984 |
| Zagadka          | 0,0710 | 0,0801 | ----   |
| Start            | 0,0752 | 0,0951 | 0,0729 |
| Melavitsa        | 0,0650 | 0,0888 | 0,0778 |
| Nayada           | 0,0925 | 0,0661 | 0,0942 |
| Bravo            | 0,0792 | 0,0828 | 0,0880 |
| Gala             | 0,0826 | 0,0944 | 0,1036 |
| Ladozhsky        | 0,1037 | 0,0840 | 0,1018 |
| Mona Liza        | 0,0663 | 0,0849 | 0,0766 |
| Ilyinsky         | 0,0658 | 0,0705 | 0,0676 |
| Nevsky           | 0,0890 | 0,0968 | 0,0908 |
| Irbitsky         | 0,0740 | 0,0708 | 0,0742 |
| Nikulinsky       | 0,0884 | 0,0837 | 0,0877 |
| Debryansky       | 0,0456 | 0,0645 | 0,0657 |
| Zhavoronok       | 0,0713 | 0,0771 | 0,0778 |
| Agata            | 0,0563 | 0,0619 | 0,0818 |
| Lyubava          | 0,0753 | 0,0729 | 0,0732 |
| Luks             | 0,0723 | 0,0752 | 0,0862 |
| Matushka         | 0,0871 | 0,0821 | 0,1002 |
| Granola          | 0,0735 | 0,0827 | ----   |
| Red Star         | 0,0543 | 0,0615 | 0,0732 |
| Meteor           | 0,0862 | 0,0823 | 0,0881 |
| Kuznechanka      | 0,0801 | 0,0804 | 0,0912 |
| Solnechny        | 0,0771 | 0,0695 | 0,0728 |
| Charoit          | 0,0648 | 0,0596 | 0,0619 |
| Impala           | 0,0530 | ----   | ----   |
| Skala            | 0,0525 | ----   | 0,0576 |
| Svitanok Kievsky | 0,0654 | 0,0599 | 0,0627 |
| Yugana           | 0,0686 | 0,0738 | 0,0707 |
| Radonezhsky      | 0,0606 | ----   | ----   |
| Bozhedar         | 0,0813 | ----   | 0,0724 |
| Kortny           | 0,0641 | 0,0651 | 0,0631 |
| Velikan          | 0,0739 | 0,0778 | 0,0842 |
| Gusar            | 0,0611 | 0,0688 | 0,0729 |
| Krepish          | 0,0582 | 0,0736 | 0,0806 |
| Kolobok          | 0,0924 | 0,0968 | 0,1075 |
| Virazh           | 0,0749 | 0,0834 | 0,0820 |

---

|                  |        |        |        |
|------------------|--------|--------|--------|
| Pamyati Osipovoi | 0,0758 | ----   | 0,0839 |
| Fioletovii       | 0,0873 | 0,0876 | 0,0920 |
| Zekura           | 0,0841 | 0,0855 | ----   |
| G 3-43-6         | 0,0560 | 0,0598 | ----   |
| C112-03          | 0,0568 | 0,0785 | ----   |
| Tuleevsky        | 0,0816 | 0,0907 | 0,0850 |
| Novosibirsky     | 0,0530 | ----   | 0,0501 |
| Zlatka           | 0,0884 | 0,0867 | 0,0851 |
| Vimpel           | 0,0684 | 0,0823 | 0,0820 |
| Favorit          | 0,0631 | 0,0769 | 0,0831 |
| Lomonosovsky     | 0,0762 | 0,0890 | 0,0924 |
| Samba            | 0,0612 | 0,0630 | ----   |
| Granat           | 0,0673 | ----   | 0,1021 |

---
